# Supplementary material for: Conformational effects in molecular tectons containing protonated benzimidazole cations
Source: Royal Society of Chemistry journal article supplement (doi:10.1039/b602468h), 2006-01-01
Supplement: b602468h.pdf [file b602468h.pdf]

## Conformational effects in molecular tectons containing protonated benzimidazole cations.

Anita Kübel-Pollak,<sup>a</sup> Craig J. Matthews,<sup>a</sup> Simon Verdan,<sup>a</sup> Bernard Bocquet,<sup>a</sup> Xavier Melich,<sup>a</sup>  
Alan F. Williams,<sup>\*a</sup> Francine Lavergnat,<sup>b</sup> Pierre-Yves Morgantini<sup>b</sup> and Gérald Bernardinelli<sup>c</sup>

### Supplementary material

Table S1 : Details of Hydrogen bonds

Fig. S1. Thermal ellipsoids (at 50% probability) and atomic numbering scheme for  
[**1b**H<sub>2</sub>][MnCl<sub>4</sub>]

Fig. S2. Thermal ellipsoids (at 50% probability) and atomic numbering scheme for the cation  
in [**3b**H<sub>2</sub>]Cl<sub>2</sub>·0.5 CH<sub>3</sub>CN

Fig. S3. Thermal ellipsoids (at 50% probability) and atomic numbering scheme for the cation  
in [**3b**H<sub>2</sub>][MnCl<sub>4</sub>]H<sub>2</sub>O

Fig. S4. Thermal ellipsoids (at 50% probability) and atomic numbering scheme for the  
complex in [Cu(**4b**)<sub>2</sub>](PF<sub>6</sub>)·CH<sub>3</sub>CN

Fig. S5. Thermal ellipsoids (at 50% probability) and atomic numbering scheme for the cation  
in [**5a**H<sub>3</sub>]Cl<sub>3</sub>·2MeOH

Fig. S6. Thermal ellipsoids (at 50% probability) and atomic numbering scheme for the cation  
in [**5b**H<sub>3</sub>]Br<sub>3</sub>·4 H<sub>2</sub>O.

Table S1. Data for hydrogen bonds

| Donor, <b>D</b>                                             | Hydrogen, <b>H</b> | Acceptor, <b>A</b> | <b>D-H</b> (Å) | <b>H...A</b> (Å) | <b>D...A</b> (Å) | Angle <b>D-H...A</b> (°) | Equivalent position for <b>A</b> |
|-------------------------------------------------------------|--------------------|--------------------|----------------|------------------|------------------|--------------------------|----------------------------------|
| <b>[1bH<sub>2</sub>][MnCl<sub>4</sub>]</b>                  |                    |                    |                |                  |                  |                          |                                  |
| N1                                                          | H1                 | Cl1                | 0.96(4)        | 2.34(5)          | 3.269(4)         | 163(4)                   | 1/2+ x , 1/2-y , -z              |
| <b>[3bH<sub>2</sub>]Cl<sub>2</sub> 0.5 CH<sub>3</sub>CN</b> |                    |                    |                |                  |                  |                          |                                  |
| N2a                                                         | H02a               | Cl1                | 1.06           | 1.93             | 2.978(5)         | 168                      | x , y , z                        |
| N4a                                                         | H04a               | Cl2                | 1.00           | 2.09             | 3.020(5)         | 154                      | x , y , z                        |
| N2b                                                         | H02b               | Cl3                | 0.91           | 2.16             | 3.020(5)         | 156                      | x , y , z                        |
| N4b                                                         | H04b               | Cl4                | 0.86           | 2.15             | 2.978(6)         | 162                      | 1-x , 1-y , 1-z                  |
| <b>[3bH<sub>2</sub>][MnCl<sub>4</sub>]H<sub>2</sub>O</b>    |                    |                    |                |                  |                  |                          |                                  |
| N1                                                          | H01                | O1w                | 0.89(3)        | 1.79(3)          | 2.677(3)         | 171(3)                   | x , y , z                        |
| N3                                                          | H03                | Cl1                | 0.85(3)        | 2.37(3)          | 3.172(2)         | 156(2)                   | x , y-1 , z                      |
| O1w                                                         | H1w                | Cl3                | 0.86(2)        | 2.42(3)          | 3.199(3)         | 151(3)                   | x , y-1 , z                      |
| O1w                                                         | H2w                | Cl3                | 0.85(3)        | 2.43(3)          | 3.156(3)         | 143(2)                   | x , y , z                        |
| <b>[5aH<sub>3</sub>]Cl<sub>3</sub>.2MeOH</b>                |                    |                    |                |                  |                  |                          |                                  |
| N1                                                          | H01                | O1a                | 0.92(10)       | 1.77(10)         | 2.681(10)        | 172(9)                   | x , y , z                        |
| N2                                                          | H02                | Cl1                | 0.99(9)        | 2.10(9)          | 3.062(8)         | 165(7)                   | -x , y-3/2 , 1-z                 |
| N3                                                          | H03                | Cl2                | 0.85(9)        | 2.20(9)          | 3.034(8)         | 166(9)                   | -x , 1/2+y , 1-z                 |
| N4                                                          | H04                | Cl3                | 0.93(9)        | 2.22(9)          | 3.144(8)         | 171(9)                   | x , y , z                        |
| N5                                                          | H05                | Cl3                | 1.12(9)        | 2.09(9)          | 3.163(8)         | 159(7)                   | x , y , z                        |
| N6                                                          | H06                | Cl1                | 0.99(10)       | 2.19(10)         | 3.075(8)         | 149(7)                   | 1-x , y-3/2 , 1-z                |
| O1a                                                         | H1a                | Cl2                | 1.01(9)        | 2.12(9)          | 3.085(7)         | 160(8)                   | 1-x , 1/2+y , 1-z                |
| O1b                                                         | H1b                | Cl3                | 1.18(8)        | 1.97(8)          | 3.127(8)         | 166(7)                   | 1-x , 1/2+y , 1-z                |
| <b>[5bH<sub>3</sub>]Br<sub>3</sub>.4 H<sub>2</sub>O</b>     |                    |                    |                |                  |                  |                          |                                  |
| O1w                                                         | H11w               | Br                 | 0.89(3)        | 2.53(3)          | 3.419(3)         | 175(2)                   | 2/3-y , 1/3+x-y , 1/3+z          |
| O1w                                                         | H12w               | Br                 | 0.90(3)        | 2.46(2)          | 3.340(2)         | 166(2)                   | 1-x , 1-y , 1-z                  |
| N1                                                          | H01                | O1w                | 0.98           | 1.79             | 2.732(5)         | 161                      | 1-x+y , 1-x , z                  |

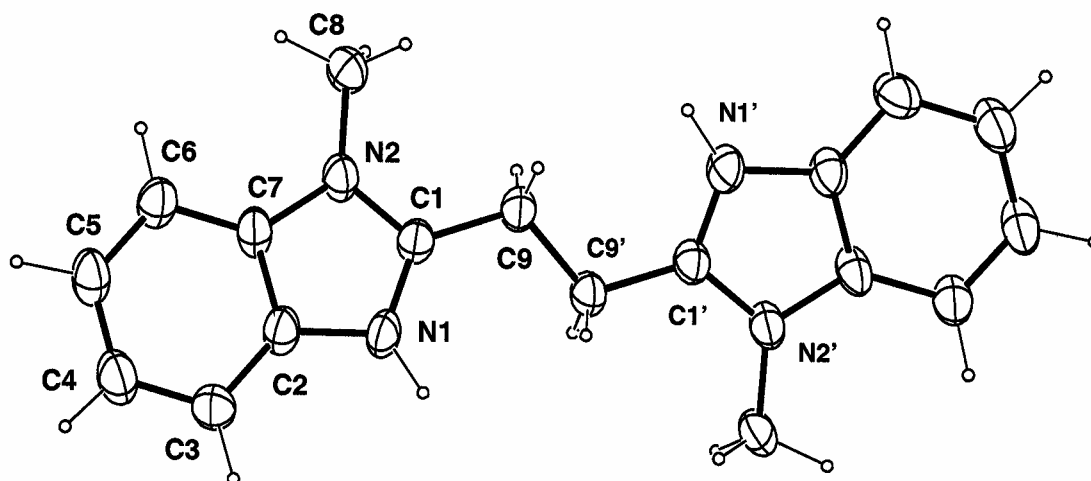

Fig. S1. Thermal ellipsoids (at 50% probability) and atomic numbering scheme for  $[1bH_2][MnCl_4]$

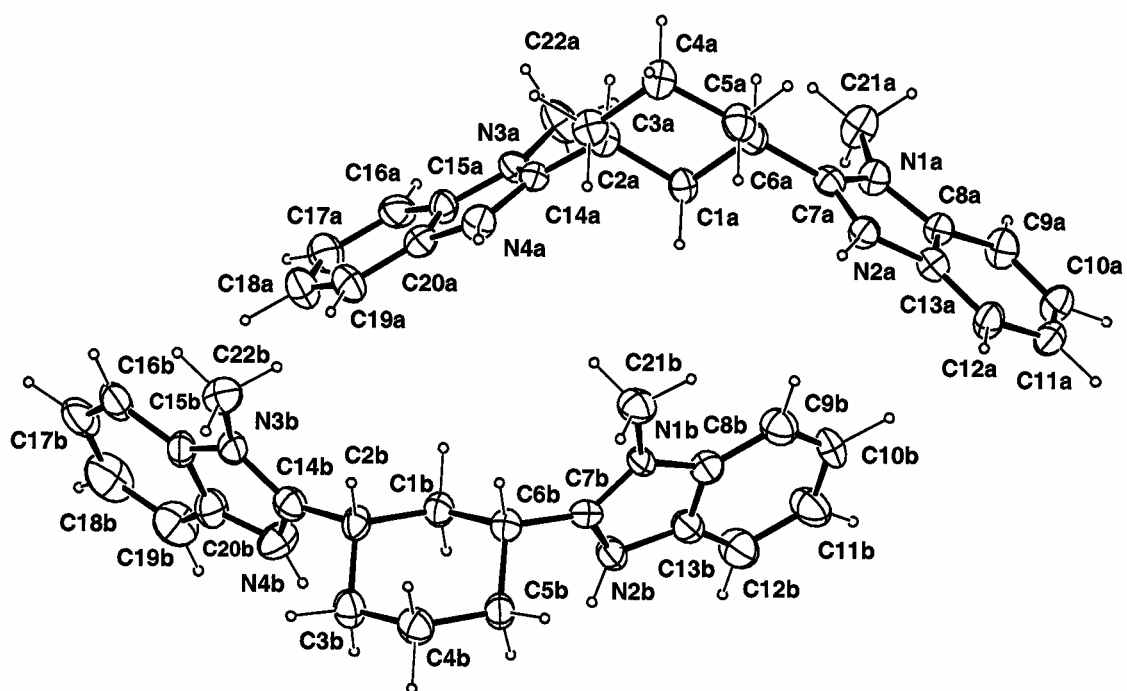

Fig. S2. Thermal ellipsoids (at 50% probability) and atomic numbering scheme for the cation in  $[3bH_2]Cl_2 \cdot 0.5 CH_3CN$

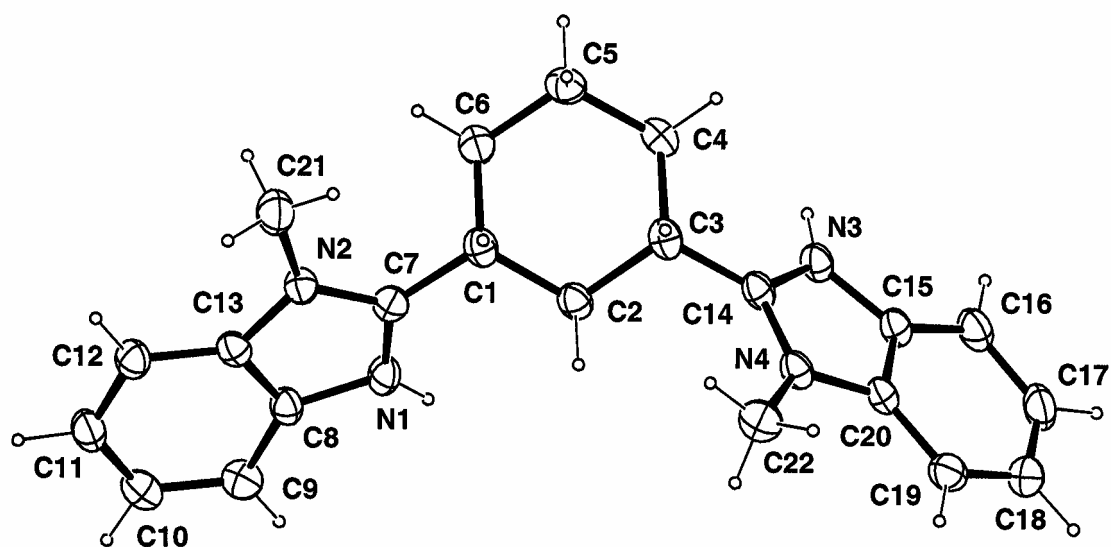

Fig. S3. Thermal ellipsoids (at 50% probability) and atomic numbering scheme for the cation in  $[3bH_2][MnCl_4] \cdot H_2O$

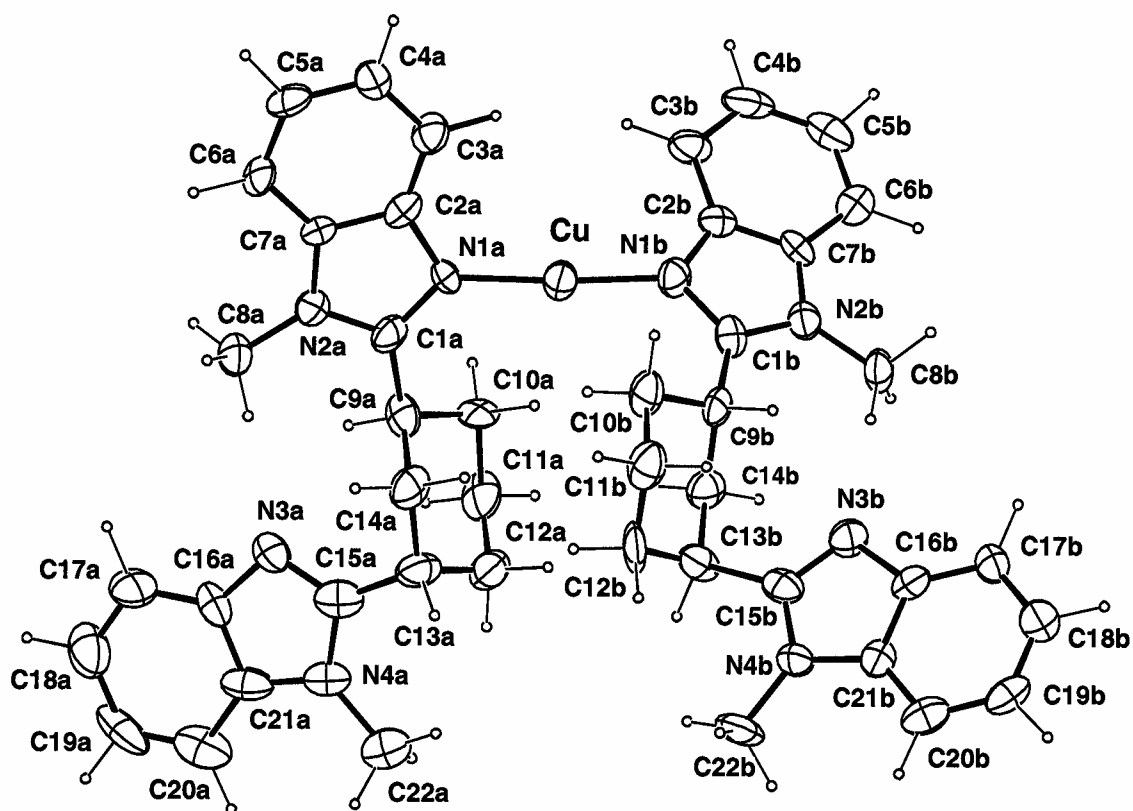

Fig. S4. Thermal ellipsoids (at 50% probability) and atomic numbering scheme for the complex in  $[Cu(4b)_2](PF_6) \cdot CH_3CN$

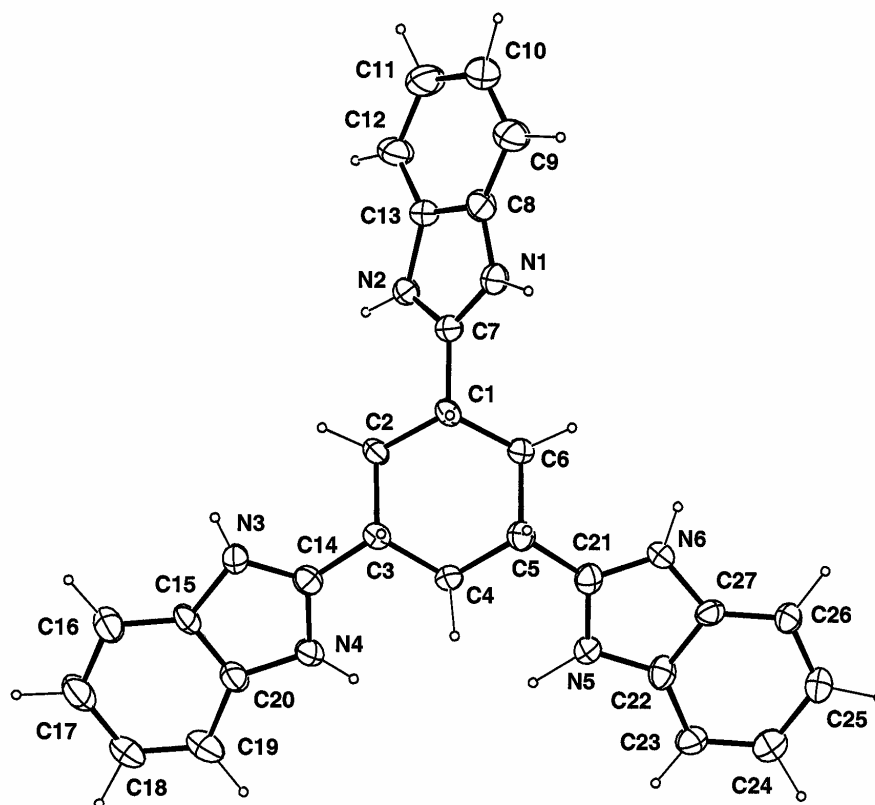

Fig. S5. Thermal ellipsoids (at 50% probability) and atomic numbering scheme for the cation in  $[5aH_3]Cl_3 \cdot 2MeOH$
